# Supplementary material
Source: Springer Nature journal article supplement (https://www.springermedizin.de/resource/supplementary/12884_2011_501_MOESM1_ESM.pdf/9457984)

**Percentage of Singleton Preterm Births  
New Mexico, 1991-2005**

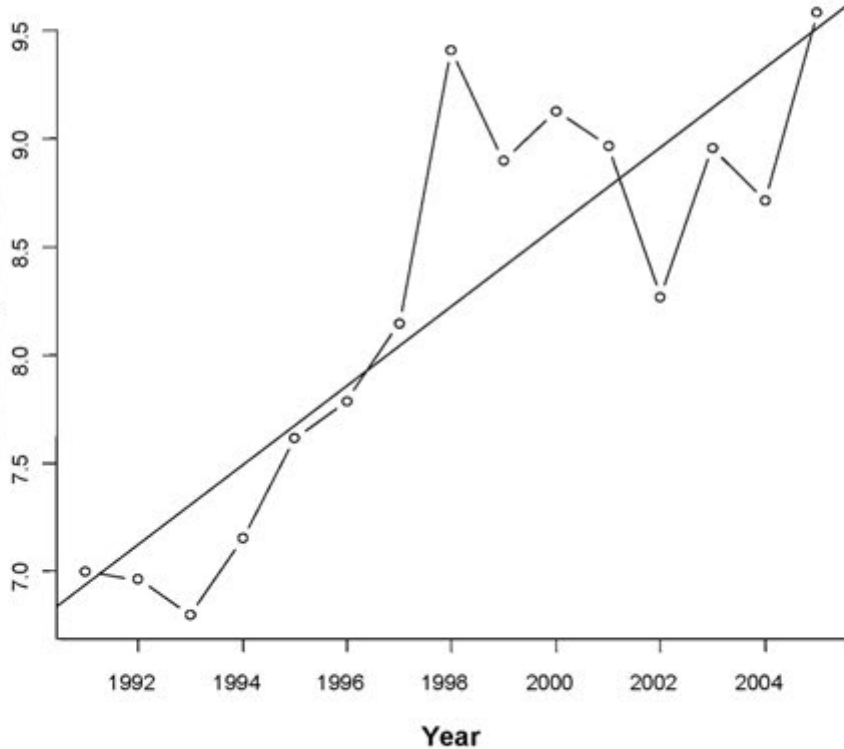

Supplement: MOESM1 [file 9457984]
